# Supplementary material
Source: MDPI journal article supplement (https://www.mdpi.com/2076-3263/13/4/109)
Supplement: s1 [file s1]

## Subduction and hydrogen Release: The case of Bolivian Altiplano

I Moretti et al.

Supplementary material:

**Table S1.** Site coordinates:

| Site N° | Name               | long          | lat           |
|---------|--------------------|---------------|---------------|
| 1       | <i>Without</i>     | 18°10'8.22"S  | 66°59'49.41"O |
| 2       | Popoo              | 18°23'2.56"S  | 66°56'35.10"O |
| 3       | Pazña              | 18°35'31.25"S | 66°55'29.37"O |
| 4       | Malliri            | 18°44'47.8"S  | 66°43'14"O    |
| 5       | Castilla Huma      | 19°08'32"S    | 66°41'07"O    |
| 7       | Colchani-X         | 20°12'50"S    | 66°57'15"O    |
| 8       | Palacio de sal     | 20°18'19.31"S | 66°58'30.74"O |
| 9       | Salar              | 20° 5'18.54"S | 67°31'4.55"O  |
| 10      | Laguna Cachi       | 21°44'34.91"S | 67°57'2.11"O  |
| 11      | Laguna Kara        | 21°53'17.30"S | 67°52'40.60"O |
| 12      | Sol de mañana      | 22°26'04"S    | 67°45'23"O    |
| 13      | Laguna Chaipri     | 22°28'8.28"S  | 67°32'57.49"O |
| 14      | Laguna Blanca      | 22°46'57.14"S | 67°48'9.97"O  |
| 15      | Verde/Blanca       | 22°46'46.50"S | 67°48'24.20"O |
| 16      | Quarry             | 22°39'28.1"S  | 67°45'30.1"O  |
| 17      | Laguna Chiar Kkota | 21°35'22.50"S | 68° 3'16.70"O |
| 18      | <i>Without</i>     | 21°32'33.10"S | 68°01'43"O    |
| 19      | <i>Without</i>     | 21°16'36.9"S  | 67°16'19.7"O  |
| 20      | <i>Without</i>     | 21°16'23.8"S  | 67°14'14.0"O  |
| 21      | Mina san Cristobal | 21° 4'28.29"S | 67°10'43.00"O |
| 22      | Sajama_1           | 18°05'38"S    | 69°01'44"O    |
| 23      | Sajama_2           | 18°05'21"S    | 68°58'37.6"O  |

**Table S2.** GA5000 raw data, **B** gas from bubbling water, **soil** gas soil measurement, **F** Fumaroles.

| Day        | Site | Type | Temp °C | Sample | CH <sub>4</sub> (%) | CO <sub>2</sub> (%) | O <sub>2</sub> (%) | H <sub>2</sub> (ppm) | CO (ppm) | H <sub>2</sub> S (ppm) | BAL-ANCE (%) |
|------------|------|------|---------|--------|---------------------|---------------------|--------------------|----------------------|----------|------------------------|--------------|
| 23/06/2022 | 1    | B    |         | 1      | 0.3                 | 37.5                | 9.5                | 0                    | 0        | 3                      | 54.3         |
|            |      | B    |         | 1bis   | 0.33                | 10                  |                    | 0                    | 0        | 3                      | 57.8         |
|            |      | B    |         | 2      | 0.6                 | 9                   | 13                 | 0                    | 0        | 0                      | 80           |
|            | 2    | B    | 66      | 1      | 1.7                 | 38                  | 6.7                | 0                    | 1        | 10                     | 53.8         |
|            |      | B    | 62.5    | 1      | 1                   | 10                  | 12                 | 0                    | 0        | 0                      | 78           |
|            | 3    | B    | 44.5    | 1      | 0.4                 | 23                  | 9.4                | 0                    | 0        | 1                      | 66.8         |
|            |      | B    |         | 1bis   | 0.4                 | 25                  | 9                  | 0                    | 0        | 1                      | 65.6         |
|            |      | B    | 54      | 1      | 0.3                 | 11                  | 12                 | 0                    | 0        | 0                      | 77           |
|            | 4    | B    | 40      |        | 0.3                 | 0.4                 | 11.3               | 0                    | 0        | 0                      | 84           |
| 24/06/2022 | 5    | B    | 56      | 1      | 0.2                 | 0.2                 | 15.1               | 0                    | 0        | 0                      | 84.5         |
|            |      | B    |         | 2      | 0.3                 | 7.5                 | 13                 | 0                    | 0        | 0                      | 77           |
|            |      | B    |         | 3      | 0.3                 | 10.4                | 12.1               | 0                    | 0        | 0                      | 69.5         |
|            |      | B    |         | 4      | 0.3                 | 20                  | 11                 | 0                    | 0        | 0                      | 70           |
|            | 6    | soil |         | 1      | 1.4                 | 1.4                 | 15.1               | 0                    | 0        | 0                      | 84           |
|            |      | soil |         | 2      | 0.3                 | 0.2                 | 15.3               | 0                    | 0        | 0                      | 84.2         |
|            |      | soil |         | 3      | 0.3                 | 0.2                 | 15.3               | 7                    | 0        | 0                      | 84.2         |
|            |      | soil |         | 4      | 0.3                 | 0.2                 | 15.4               | 1                    | 0        | 0                      | 84.1         |
|            | 7    | soil |         | 1      | 0.3                 | 25.7                | 13.3               | 0                    | 2        | 0                      | 61.2         |

|            |    |      |    |   |     |      |      |     |   |     |      |
|------------|----|------|----|---|-----|------|------|-----|---|-----|------|
|            |    | soil |    | 2 | 0.3 | 25.8 | 12.1 | 1   | 2 | 0   | 61.8 |
|            |    | soil |    | 3 | 0.3 | 28.5 | 11.7 | 1   | 0 | 0   | 59.5 |
|            |    | soil |    | 4 | 0.3 | 8.3  | 14.1 | 87  | 2 | 0   | 77.4 |
|            |    | soil |    | 5 | 0.3 | 6.2  | 14.4 | 0   | 0 | 0   | 79   |
|            |    | soil |    | 6 | 0.3 | 0.6  | 15   | 41  | 0 | 0   | 84.1 |
|            | 8  | soil |    | 1 | 0.3 | 0.2  | 15.5 | 14  | 0 | 0   | 84   |
|            |    | soil |    | 2 | 0.3 | 0.2  | 15.5 | 0   | 0 | 0   | 84.1 |
|            | 9  | soil |    | 1 | 0.3 | 0.2  | 15.4 | 0   | 0 | 0   | 84.1 |
|            |    | soil |    | 2 | 0.3 | 0.2  | 15.4 | 0   | 0 | 0   | 84.1 |
| 26/06/2022 | 10 | soil |    | 1 | 0.4 | 0.2  | 15.3 | 5   | 0 | 0   | 84.1 |
|            |    | soil |    | 2 | 0.4 | 0.2  | 15.3 | 11  | 0 | 0   | 84.1 |
|            | 11 | soil |    | 1 | 0.4 | 0.4  | 15.2 | 0   | 0 | 0   | 84   |
|            |    | soil |    | 2 | 0.4 | 0.2  | 15.2 | 0   | 0 | 0   | 84.2 |
|            |    | soil |    | 3 | 0.4 | 0.2  | 15.2 | 0   | 0 | 0   | 84.2 |
| 27/06/2022 | 12 | F    | 65 | 1 | 0.7 | 4.1  | 14.8 | 32  | 0 | 214 | 84   |
|            |    | F    |    | 2 | 0.5 | 1.1  | 15.6 | 0   | 0 | 74  | 82.6 |
|            |    | F    | 95 | 3 | 0.5 | 1.6  | 15.6 | 8   | 0 | 300 | 80.4 |
|            | 13 | soil |    | 1 | 0.4 | 0.5  | 15.3 | 87  | 3 | 7   | 83.8 |
|            |    | soil |    |   | 0.4 | 0.3  | 15.5 | 20  | 0 | 5   | 83.8 |
|            |    | soil |    |   | 0.3 | 0.3  | 15.4 | 23  | 0 | 4   | 83.9 |
|            |    | soil |    |   | 0.4 | 0.4  | 15.1 | 150 | 1 | 5   | 84.1 |
|            |    | soil |    |   | 0.4 | 0.3  | 15.3 | 14  | 0 | 4   | 84   |
|            |    | soil |    |   | 0.4 | 0.3  | 15.4 | 8   | 0 | 4   | 84   |
|            |    | soil |    |   | 0.4 | 0.3  | 15.4 | 0   | 0 | 0   | 84   |
|            | 14 | soil |    |   | 0.4 | 0.4  | 15.3 | 76  | 1 | 3   | 83.9 |
|            |    | soil |    |   | 0.4 | 0.3  | 15.4 | 4   | 0 | 3   | 83.9 |
|            | 15 | soil |    |   | 0.4 | 0.2  | 14.9 | 0   | 0 | 12  | 84.5 |
|            |    | soil |    |   | 0.4 | 0.2  | 15   | 0   | 0 | 4   | 84.5 |
|            |    | soil |    |   | 0.3 | 0.2  | 15   | 0   | 0 | 4   | 84.4 |
|            | 16 | soil |    |   | 0.5 | 0.3  | 15.4 | 121 | 0 | 3   | 83.7 |
|            |    | soil |    |   | 0.5 | 0.3  | 15.5 | 118 | 0 | 3   | 83.6 |
|            |    | soil |    |   | 0.5 | 0.3  | 15.9 | 82  | 0 | 3   | 83.3 |
|            |    | soil |    |   | 0.5 | 0.3  | 15.9 | 83  | 0 | 3   | 83.2 |
| 28/06/2022 | 17 | soil |    |   | 0.4 | 0.4  | 15.1 | 43  | 1 | 1   | 84.1 |
|            |    | soil |    |   | 0.4 | 0.3  | 15.2 | 0   | 0 | 1   | 84.2 |
|            |    | soil |    |   | 0.4 | 0.7  | 15.1 | 0   | 0 | 1   | 83.9 |
|            |    | soil |    |   | 0.4 | 0.3  | 15.2 | 0   | 0 | 1   | 84.1 |
|            |    | soil |    |   | 0.4 | 0.3  | 15.2 | 2   | 0 | 1   | 84.1 |
|            | 18 | soil |    |   | 0.4 | 0.5  | 15.5 | 42  | 0 | 1   | 83.8 |
|            |    | soil |    |   | 0.4 | 0.3  | 15.5 | 10  | 0 | 1   | 83.9 |
|            |    | soil |    |   | 0.4 | 0.2  | 15.5 | 0   | 0 | 1   | 83.9 |
|            |    | soil |    |   | 0.4 | 0.3  | 15.4 | 70  | 0 | 1   | 83.9 |
|            |    | soil |    |   | 0.4 | 0.2  | 15.5 | 0   | 0 | 1   | 83.9 |
|            | 19 | soil |    |   | 0.4 | 0.2  | 15.4 | 0   | 0 | 1   | 84   |
|            |    | soil |    |   | 0.3 | 0.2  | 15.3 | 0   | 0 | 1   | 84.2 |
|            |    | soil |    |   | 0.4 | 0.2  | 15.2 | 0   | 0 | 1   | 84.2 |
|            | 20 | soil |    |   | 0.3 | 0.2  | 15.1 | 0   | 1 | 2   | 84.4 |
|            |    | soil |    |   | 0.3 | 0.2  | 15.1 | 0   | 0 | 1   | 84.4 |
|            |    | soil |    |   | 0.3 | 0.2  | 15.1 | 0   | 0 | 2   | 84.4 |
|            | 21 | soil |    |   | 0.3 | 0.1  | 14.8 | 0   | 0 | 2   | 84.8 |
|            |    | soil |    |   | 0.3 | 0.1  | 14.7 | 0   | 0 | 2   | 84.8 |

|            |    |      |    |     |     |      |   |   |   |      |
|------------|----|------|----|-----|-----|------|---|---|---|------|
|            |    | soil |    | 0.2 | 0.1 | 14.8 | 0 | 0 | 2 | 84.8 |
|            | 22 | B    |    | 0.4 | 0.1 | 15.1 | 0 | 0 | 2 | 84.4 |
|            |    | B    |    | 0.3 | 0.1 | 15.1 | 0 | 0 | 2 | 84.5 |
|            |    | B    |    | 0.3 | 0.1 | 15   | 0 | 0 | 2 | 84.6 |
|            |    | B    |    | 0.3 | 0.2 | 15.4 | 0 | 0 | 0 | 84.1 |
|            |    | B    |    | 0.4 | 0.2 | 15.2 | 1 | 0 | 0 | 84.1 |
|            |    | B    |    | 0.3 | 0.2 | 15.4 | 1 | 0 | 0 | 84.1 |
| 30/06/2022 | 23 | B    | 74 | 0.5 | 33  | 12.6 | 0 | 0 | 0 | 54   |
|            |    | B    | 61 | 0.5 | 45  | 14   | 0 | 0 | 0 | 45   |
|            |    | B    | 80 | 0.4 | 48  | 10   | 0 | 0 | 2 | 40   |
